# Supplementary material for: Inorganic–organic hybridization induced uniaxial zero thermal expansion in MC4O4 (M = Ba, Pb)
Source: Royal Society of Chemistry journal article supplement (doi:10.1039/c9cc00226j), 2019-01-01
Supplement: c9cc00226j1.pdf [file c9cc00226j1.pdf]

# Supporting Information

## Inorganic-organic Hybridization Induced Uniaxial Zero Thermal Expansion in $\text{MC}_4\text{O}_4$ ( $\text{M} = \text{Ba}, \text{Pb}$ )

Zhanning Liu,<sup>a</sup> Kun Lin,<sup>a</sup> Yang Ren,<sup>b</sup> Kenichi Kato,<sup>c</sup> Yili Cao,<sup>a</sup> Jinxia Deng,<sup>a</sup> Jun Chen,<sup>a</sup> and  
Xianran Xing<sup>\*a</sup>

- a. Beijing Advanced Innovation Center for Materials Genome Engineering, Department of Physical Chemistry, University of Science and Technology Beijing, Beijing, 100083, China
- b. X-Ray Science Division, Argonne National Laboratory, Argonne, Illinois 60439, United States.
- c. RIKEN SPring-8 Center, Hyogo 679-5148, Japan

### 1. Materials and detail of synthesis

All of the chemicals used in this experiment were analytical grade and used without further purification.

**BaC<sub>4</sub>O<sub>4</sub>:** Squaric acid (114mg, 1 mmol), NaOH (80 mg, 2 mmol) and Ba(NO<sub>3</sub>)<sub>2</sub> (261mg, 1 mmol) were dissolved in 20 ml deionized water under stirring. Then the mixture was transferred into a 50 ml Teflon-lined autoclave and heated at 80 °C for 48h. After cooling to room temperature, colorless crystals were collected.

**PbC<sub>4</sub>O<sub>4</sub>:** Squaric acid (456mg, 4 mmol), and Pb(NO<sub>3</sub>)<sub>2</sub> (331mg, 1 mmol) were dissolved in 25 ml deionized water under stirring. Then the mixture was transferred into a 50 ml Teflon-lined autoclave and heated at 180 °C for 24h. After cooling to room temperature, white powder products were collected.

Before measurements, all samples were washed several times with deionized water and ethanol, and dried at 120 °C overnight.

### 2. Laboratory powder X-ray diffraction

The laboratory powder X-ray diffraction (PXRD) data were collected on a PANalytical diffractometer with Cu K $\alpha$  radiation.

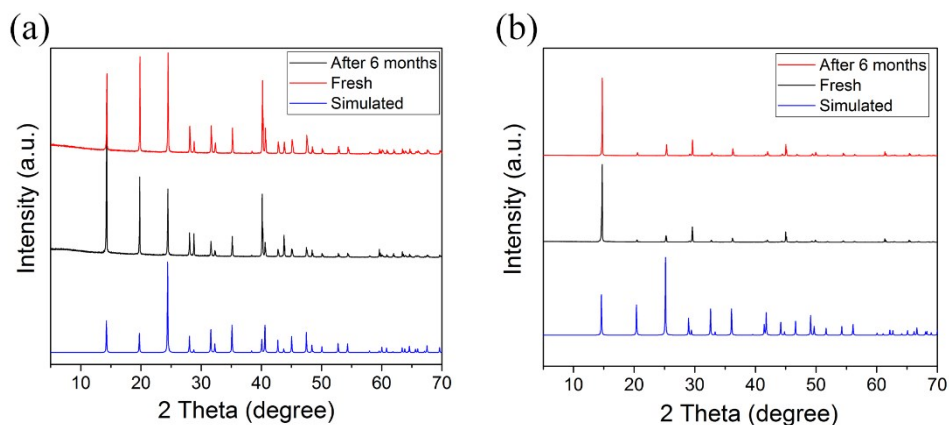

**Figure S1** (a) PXRD patterns of the simulated  $\text{BaC}_4\text{O}_4$  (blue), freshly synthesized  $\text{BaC}_4\text{O}_4$  (black) and the one exposed in air for 6 months (red). (b) PXRD patterns of the simulated  $\text{PbC}_4\text{O}_4$  (blue), freshly synthesized  $\text{PbC}_4\text{O}_4$  (black) and the one exposed in air for 6 months (red).

### 3. Thermo-gravimetric analysis

Thermo Gravimetric-Differential Scanning Calorimetry (TG-DSC) measurement was performed using a Labsys Evo system (by SETRAM) with a rate of  $5^\circ\text{C}\cdot\text{min}^{-1}$  under air.

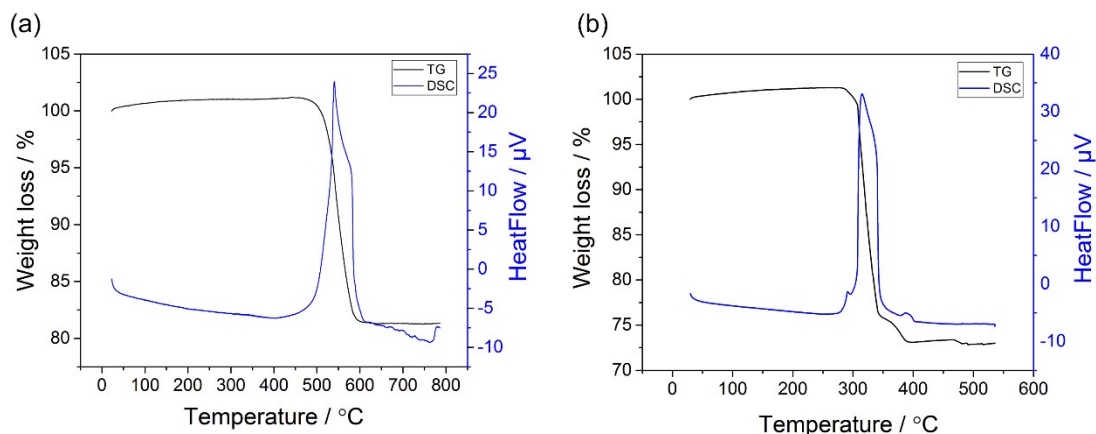

**Figure S2.** TG-DSC curves of  $\text{BaC}_4\text{O}_4$  (a) and  $\text{PbC}_4\text{O}_4$  (b). The weight loss and the exothermic peak at  $500^\circ\text{C}$  (a) and  $300^\circ\text{C}$  (b) corresponds to the decomposition of the compound.

### 4. Variable temperature synchrotron X-ray diffraction

Variable temperature synchrotron X-ray diffraction (SXRD) were collected at the SPring-8 BL44B2 beamline for  $\text{BaC}_4\text{O}_4$  and  $\text{PbC}_4\text{O}_4$ . Before loading, both samples are grinded into powder. Then, the powder samples are loaded into 0.5 mm capillaries and sealed in air. The wavelength was calibrated

to  $\lambda = 0.45 \text{ \AA}$  using a  $\text{CeO}_2$  standard. The data were collected from 125 K to 700 K (125 to 550 K for  $\text{PbC}_4\text{O}_4$ ) with a heating rate  $50 \text{ K min}^{-1}$ .

The variable temperature SXRD data were analyzed by Rietveld refinement using the Fullprof program<sup>[1]</sup> (Figure S3). The background was modelled by a 6-coefficients polynomial function. The scale factor, lattice parameters, zero point were also refined. The Pseudo-voigt function was chosen to generate the peak shapes. The coordinates and isotropic atomic displacement parameter were refined for all atoms. The result of the final Rietveld refinement plot and results are shown in figure S3, Table S1 and Table S2. The lattice parameters extracted from Rietveld refinements are listed in Table S3 and S4.

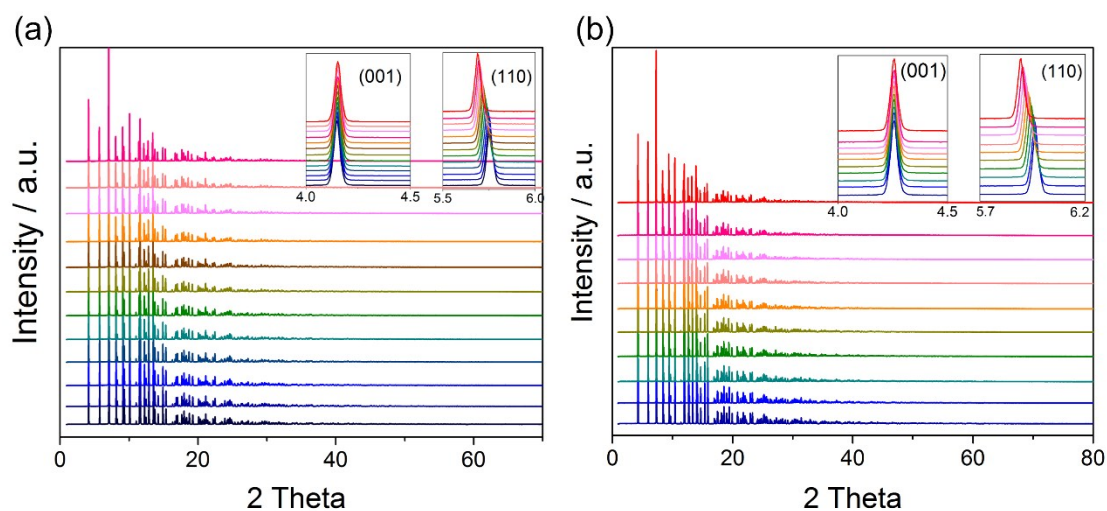

**Figure S3.** Temperature dependent synchrotron X-ray diffraction patterns of  $\text{BaC}_4\text{O}_4$  (a) and  $\text{PbC}_4\text{O}_4$  (b). The insets are the zoomed peaks of (001) and (110). From bottom to top correspond to the temperature 125, 150, 200, 250, 300, 350, 400, 450, 500, 550, 600, 650, 700 K (550K for  $\text{PbC}_4\text{O}_4$ ).

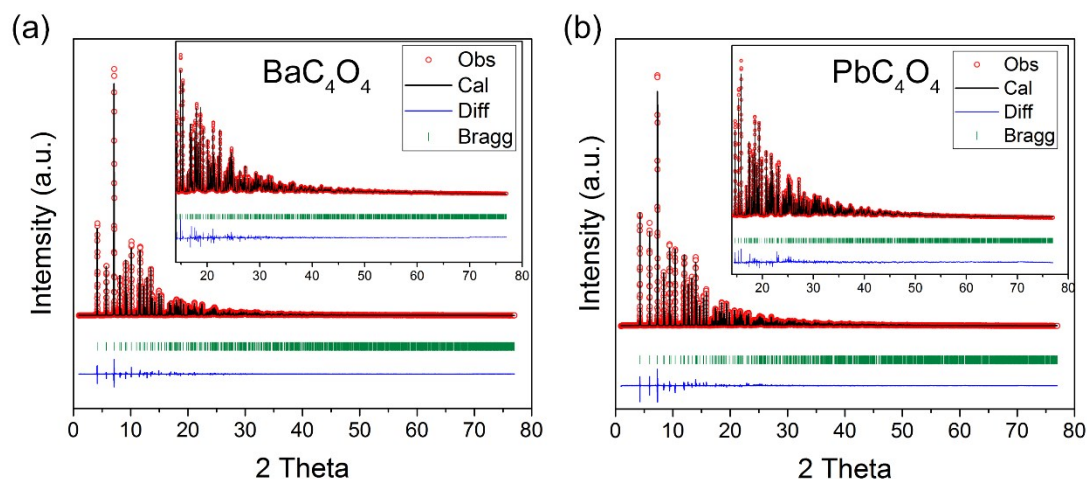

**Figure S4** Rietveld refinement of SXRD data of  $\text{BaC}_4\text{O}_4$  (a) and  $\text{PbC}_4\text{O}_4$  (b) at 300 K. Zoomed in parts at high angles are shown in the inset. ( $R_p=8.46$ ,  $R_{wp}=9.88$ ,  $\chi^2=10.00$  for  $\text{BaC}_4\text{O}_4$ , and  $R_p=9.99$ ,  $R_{wp}=10.8$ ,  $\chi^2=7.42$  for  $\text{PbC}_4\text{O}_4$ ).

**Table S1** Atomic coordinates, thermal parameters and occupancy for BaC<sub>4</sub>O<sub>4</sub> extracted from the Rietveld refinement.

| Atom | x      | y      | z      | Occupancy | Uiso  | Multiplicity & Wyckoff |
|------|--------|--------|--------|-----------|-------|------------------------|
| Ba   | 0.0000 | 0.0000 | 0.2500 | 1.000     | 0.004 | 4a                     |
| O    | 0.1789 | 0.3210 | 0.1330 | 1.000     | 0.006 | 16l                    |
| C    | 0.0817 | 0.4183 | 0.0589 | 1.000     | 0.004 | 16l                    |

**Table S2** Atomic coordinates, thermal parameters and occupancy for PbC<sub>4</sub>O<sub>4</sub> extracted from the Rietveld refinement.

| Atom | x      | y      | z      | Occupancy | Uiso  | Multiplicity & Wyckoff |
|------|--------|--------|--------|-----------|-------|------------------------|
| Pb   | 0.0000 | 0.0000 | 0.2500 | 1.000     | 0.004 | 4a                     |
| O    | 0.1852 | 0.3148 | 0.1353 | 1.000     | 0.007 | 16l                    |
| C    | 0.0867 | 0.4133 | 0.0581 | 1.000     | 0.001 | 16l                    |

**Table S3** Temperature dependent lattice parameters of BaC<sub>4</sub>O<sub>4</sub> derived from the Rietveld refinement

| Temperature / K | <i>a</i> / Å | <i>c</i> / Å | <i>V</i> / Å <sup>3</sup> |
|-----------------|--------------|--------------|---------------------------|
| 125             | 6.3327(3)    | 12.4103(6)   | 497.687(7)                |
| 150             | 6.3356(3)    | 12.4091(6)   | 498.093(7)                |
| 200             | 6.3415(3)    | 12.4071(5)   | 498.949(7)                |
| 250             | 6.3478(4)    | 12.4052(5)   | 499.862(7)                |
| 300             | 6.3543(4)    | 12.4033(5)   | 500.803(7)                |
| 350             | 6.3606(4)    | 12.4019(5)   | 501.742(7)                |
| 400             | 6.3668(4)    | 12.4005(6)   | 502.667(8)                |
| 450             | 6.3730(4)    | 12.3993(6)   | 503.606(8)                |
| 500             | 6.3794(4)    | 12.3980(6)   | 504.559(8)                |
| 550             | 6.3860(4)    | 12.3966(7)   | 505.546(8)                |
| 600             | 6.3922(5)    | 12.3957(7)   | 506.488(8)                |
| 650             | 6.3984(5)    | 12.3951(7)   | 507.451(8)                |
| 700             | 6.4050(5)    | 12.3945(7)   | 508.469(8)                |

**Table S4** Temperature dependent lattice parameters of PbC<sub>4</sub>O<sub>4</sub> derived from the Rietveld refinement

| Temperature / K | <i>a</i> / Å | <i>c</i> / Å | <i>V</i> / Å <sup>3</sup> |
|-----------------|--------------|--------------|---------------------------|
| 125             | 6.1089(3)    | 12.0941(5)   | 451.342(7)                |
| 150             | 6.1128(3)    | 12.0941(5)   | 451.909(7)                |
| 200             | 6.1208(3)    | 12.0938(5)   | 453.080(7)                |
| 250             | 6.1291(3)    | 12.0936(5)   | 454.305(7)                |
| 300             | 6.1376(4)    | 12.0931(6)   | 455.545(7)                |
| 350             | 6.1460(4)    | 12.0928(6)   | 456.785(8)                |

|     |           |            |            |
|-----|-----------|------------|------------|
| 400 | 6.1541(4) | 12.0925(6) | 457.979(8) |
| 450 | 6.1623(4) | 12.0921(6) | 459.191(8) |
| 500 | 6.1709(5) | 12.0917(7) | 460.452(8) |
| 550 | 6.1802(5) | 12.0910(7) | 461.809(8) |

**Table S5** Some reported inorganic-organic hybrid materials with ZTE behavior.

| Compound                                                                             | CTE ( $\times 10^{-6}$<br>K <sup>-1</sup> ) | Temperature range (K) | Reference                                                  |
|--------------------------------------------------------------------------------------|---------------------------------------------|-----------------------|------------------------------------------------------------|
| NiPt(CN) <sub>6</sub>                                                                | $\alpha_a = -1.02$                          | 100~330               | <i>JACS</i> , 2006, 128, 7009-7014. <sup>[2]</sup>         |
| Fe[Co(CN) <sub>6</sub> ]                                                             | $\alpha_a = -1.47$                          | 4.2~300               | <i>JACS</i> , 2004, 126, 15390-15391. <sup>[3]</sup>       |
| (C <sub>3</sub> H <sub>5</sub> N <sub>2</sub> ) <sub>2</sub> K[Co(CN) <sub>6</sub> ] | $\alpha_a = +1.7$                           | 200~300               | <i>Angew. Chem.</i> 2017, 129, 16166-16169. <sup>[4]</sup> |
| [Cd(HBTC)(BPP)]·1.5DMF·2H <sub>2</sub> O                                             | $\alpha_{x2} = +2$                          | 100~260               | <i>Chem. Comm.</i> 2014, 50, 6464-6467. <sup>[5]</sup>     |
| N(CH <sub>3</sub> ) <sub>4</sub> CuZn(CN) <sub>4</sub>                               | $\alpha_a = +0.67$                          | 218~368               | <i>JACS</i> , 2010, 132, 10-11. <sup>[6]</sup>             |
| ZnTe(N <sub>2</sub> H <sub>4</sub> ) <sub>0.5</sub>                                  | $\alpha_a = +3.759$                         | 95~295                | <i>JACS</i> , 2007, 129, 14140-14141. <sup>[7]</sup>       |
| $\beta$ -ZnTe(en) <sub>0.5</sub>                                                     | $\alpha_b = \sim +0.43$                     | 4~400                 | <i>PRL</i> , 99, 215901, 2007. <sup>[8]</sup>              |

## 5. Variable temperature synchrotron X-ray pair distribution function

The pair distribution function (PDF) data were extracted from high energy synchrotron X-ray scattering by direct Fourier transform of reduced structure function (F(Q), up to  $Q = 22 \text{ \AA}^{-1}$ ) using the 11-ID-C beamline at Advanced Photon Source (APS) of Argonne National Laboratory. The PDF profile refinements were carried out for BaC<sub>4</sub>O<sub>4</sub> and PbC<sub>4</sub>O<sub>4</sub> using PDFgui program.<sup>[9]</sup> The parameters, including lattice constants, atomic position, and anisotropic thermal ellipsoids, are allowed to vary until a best-fit of the PDF is obtained, using a least-squares approach.

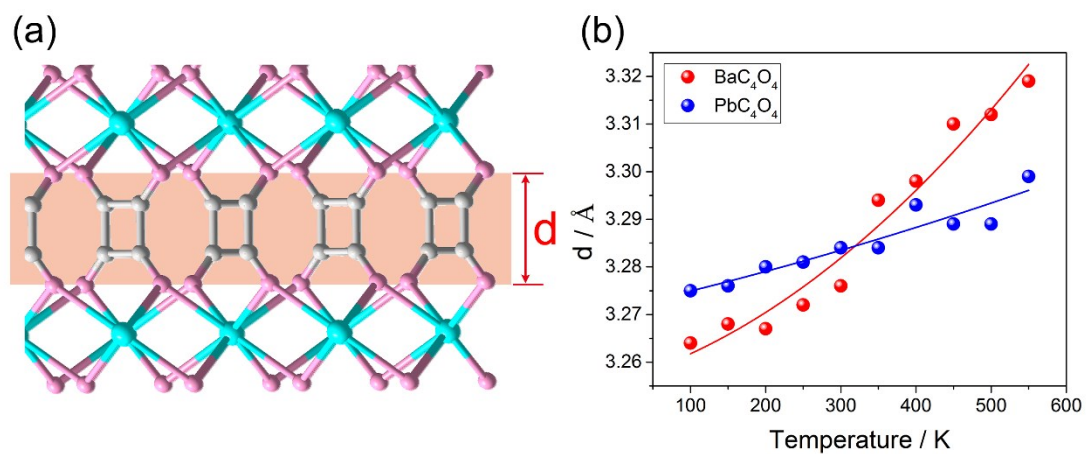

**Figure S5** (a) Crystal structure of  $\text{BaC}_4\text{O}_4$ . (b) Thermal expansion behavior of the squarate pillar along  $c$  axis (distance between two oxygen atoms along  $c$  axis) for  $\text{BaC}_4\text{O}_4$  (red) and  $\text{PbC}_4\text{O}_4$  (blue).

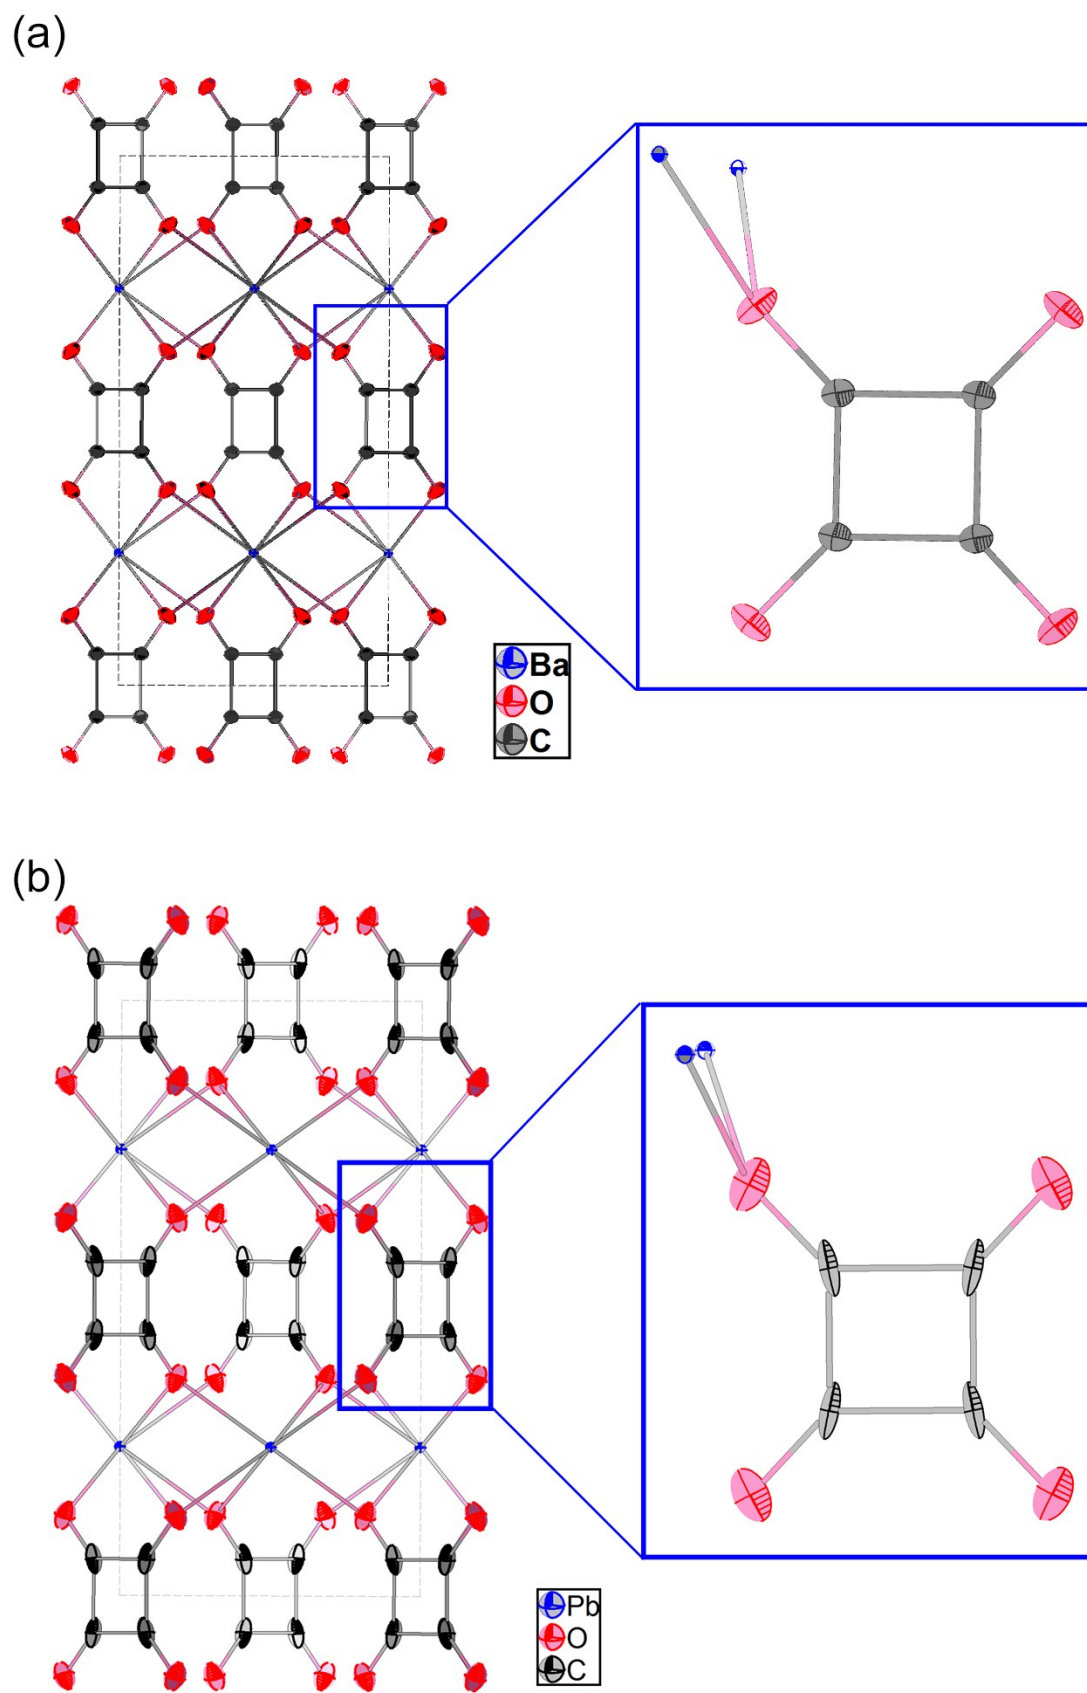

**Figure S6.** Thermal ellipsoid plot of  $\text{BaC}_4\text{O}_4$  (a) and  $\text{PbC}_4\text{O}_4$  (b) derived from the PDF fitting (drawn at 50% probability). Color code: blue for barium or lead, red for oxygen, gray for carbon.

## 6. Variable temperature Raman spectra and DFT calculation

The variable temperature Raman measurements were performed with a multichannel modular triple Raman system (JY-HR800) with confocal microscopy. The spot diameter of the focused laser beam on the sample is about 1  $\mu\text{m}$ . The solid-state diode laser (532nm) from Coherent Company-Verdi-2 was used as an excited source. Sample temperature was controlled by a temperature-controlled stage (Linkam) from 100 to 600 K with an interval of 100 K for  $\text{BaC}_4\text{O}_4$  (100 to 500 K with an interval of 50 K for  $\text{PbC}_4\text{O}_4$ ).

The first-principles atomic vibration modes assignment was performed by the plane-wave pseudopotential density functional theory (DFT)<sup>[10]</sup> implemented by CASTEP package.<sup>[11]</sup> The generalized gradient approximation (GGA) with Perdew–Burke–Ernzerhof (PBE)<sup>[12]</sup> functional was adopted and the ion-electron interactions were modeled by the optimized normal-conserving pseudopotentials<sup>[13]</sup> for all elements. The kinetic energy cutoffs of 800 eV and Monkhorst-Pack<sup>[14]</sup> k-point meshes with the spanning grid less than  $0.04/\text{\AA}^3$  in the Brillouin zone were chosen. Before the atomic vibration calculation, the crystal structure was fully optimized by Broyden–Fletcher–Goldfarb–Shanno (BFGS)<sup>[15]</sup> minimization scheme with the convergence criterions for energy, maximum force, maximum stress and maximum displacement set as  $10^{-5}$  eV/atom, 0.03 eV, 0.05 GPa and 0.001  $\text{\AA}$  respectively. The vibrational property was calculated by linear response formalism,<sup>[16]</sup> in which the phonon frequencies were obtained by the second derivative of the total energy with respect to the given perturbation.<sup>[17]</sup>

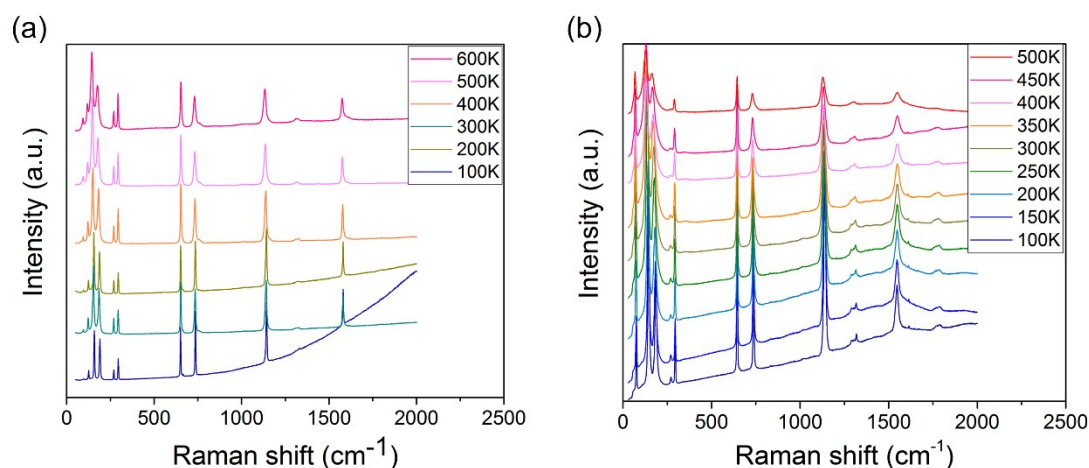

**Figure S7** Temperature dependent Raman spectra of  $\text{BaC}_4\text{O}_4$  (a) and  $\text{PbC}_4\text{O}_4$  (b).

**Table S6** Temperature dependent Raman modes of  $\text{BaC}_4\text{O}_4$  (some weak peaks are omitted.)

| Temperature<br>/ K | Mode1 | Mode2  | Mode3   | Mode4  | Mode5  | Mode6  | Mode7  | Mode8  | Mode9  | Mode10  |
|--------------------|-------|--------|---------|--------|--------|--------|--------|--------|--------|---------|
| 100                | 96.45 | 125.67 | 158.305 | 189.97 | 269.50 | 295.06 | 651.15 | 735.99 | 1143.3 | 1580.8  |
|                    |       |        |         |        |        |        |        |        | 2      |         |
| 200                | 96.36 | 124.60 | 155.88  | 188.09 | 269.40 | 294.66 | 651.69 | 735.52 | 1141.9 | 1579.94 |
|                    |       |        |         |        |        |        |        |        | 6      |         |
| 300                | 95.70 | 123.16 | 152.83  | 185.07 | 269.28 | 294.38 | 652.22 | 734.63 | 1139.9 | 1579.23 |
|                    |       |        |         |        |        |        |        |        | 9      |         |
| 400                | 95.23 | 121.43 | 149.46  | 182.07 | 268.75 | 294.20 | 652.79 | 733.36 | 1138.1 | 1578.21 |

|     |       |        |        |        |        |        |        |        |        |         |
|-----|-------|--------|--------|--------|--------|--------|--------|--------|--------|---------|
|     |       |        |        |        |        |        |        |        | 5      |         |
| 500 | 94.72 | 119.51 | 147.04 | 178.73 | 268.72 | 294.00 | 652.88 | 732.17 | 1135.7 | 1576.55 |
|     |       |        |        |        |        |        |        |        | 2      |         |
| 600 | 93.71 | 118.85 | 143.54 | 176.15 | 268.71 | 293.53 | 653.17 | 731.22 | 1133.4 | 1574.77 |

**Table S7** Temperature dependent Raman modes of PbC<sub>4</sub>O<sub>4</sub> (some weak perks are omitted.)

| Temperature<br>/ K | Mode1 | Mode2  | Mode3  | Mode4  | Mode5  | Mode6  | Mode7  | Mode8  | Mode9  | Mode10  |
|--------------------|-------|--------|--------|--------|--------|--------|--------|--------|--------|---------|
| 100                | 76.26 | 108.31 | 145.80 | 185.99 | 271.48 | 295.03 | 644.96 | 737.09 | 1139.2 | 1547.85 |
|                    |       |        |        |        |        |        |        |        | 9      |         |
| 150                | 74.99 | 106.88 | 143.73 | 183.71 | 270.71 | 294.75 | 644.85 | 736.18 | 1138.0 | 1547.73 |
|                    |       |        |        |        |        |        |        |        | 2      |         |
| 200                | 74.08 | 105.11 | 141.30 | 180.00 | 269.84 | 293.74 | 644.93 | 735.30 | 1136.9 | 1547.66 |
|                    |       |        |        |        |        |        |        |        | 7      |         |
| 250                | 73.08 | 103.09 | 138.46 | 176.33 | 269.33 | 293.23 | 644.88 | 734.36 | 1135.2 | 1547.64 |
|                    |       |        |        |        |        |        |        |        | 9      |         |
| 300                | 71.96 | 101.24 | 136.09 | 173.98 | 268.26 | 292.73 | 644.94 | 733.67 | 1134.5 | 1547.38 |
|                    |       |        |        |        |        |        |        |        | 9      |         |
| 350                | 71.03 | 99.86  | 133.38 | 170.90 | 267.80 | 291.96 | 644.77 | 732.50 | 1132.7 | 1547.06 |
|                    |       |        |        |        |        |        |        |        | 2      |         |
| 400                | 70.04 | 96.48  | 132.22 | 169.51 | 267.18 | 291.22 | 644.32 | 732.05 | 1131.5 | 1547.06 |
|                    |       |        |        |        |        |        |        |        | 8      |         |
| 450                | 69.38 | 93.50  | 130.08 | 166.88 | 266.85 | 291.11 | 644.66 | 731.76 | 1130.8 | 1546.70 |
|                    |       |        |        |        |        |        |        |        | 6      |         |
| 500                | 68.69 | 92.87  | 127.09 | 164.31 | 266.45 | 290.73 | 644.25 | 729.91 | 1128.6 | 1546.39 |
|                    |       |        |        |        |        |        |        |        | 3      |         |

## Reference:

- [1] J. Rodriguez-Carvajal, in *satellite meeting on powder diffraction of the XV congress of the IUCr*, Vol. 127, Toulouse, France:[sn], **1990**.
- [2] K. W. Chapman, P. J. Chupas, C. J. Kepert, *Journal of the American Chemical Society* **2006**, *128*, 7009-7014.
- [3] S. Margadonna, K. Prassides, A. N. Fitch, *Journal of the American Chemical Society* **2004**, *126*, 15390-15391.
- [4] A. E. Phillips, A. D. Fortes, *Angewandte Chemie* **2017**, *129*, 16166-16169.
- [5] P. Lama, R. K. Das, V. J. Smith, L. J. Barbour, *Chemical Communications* **2014**, *50*, 6464-6467.
- [6] A. E. Phillips, G. J. Halder, K. W. Chapman, A. L. Goodwin, C. J. Kepert, *Journal of the American Chemical Society* **2009**, *132*, 10-11.
- [7] J. Li, W. Bi, W. Ki, X. Huang, S. Reddy, *Journal of the American Chemical Society* **2007**, *129*, 14140-14141.
- [8] Y. Zhang, Z. Islam, Y. Ren, P. Parilla, S. Ahrenkiel, P. Lee, A. Mascarenhas, M. McNevin, I. Naumov, H.-X. Fu, *Physical review letters* **2007**, *99*, 215901.

- [9] C. Farrow, P. Juhas, J. Liu, D. Bryndin, E. Božin, J. Bloch, T. Proffen, S. Billinge, *Journal of Physics: Condensed Matter* **2007**, *19*, 335219.
- [10] M. C. Payne, M. P. Teter, D. C. Allan, T. Arias, a. J. Joannopoulos, *Reviews of modern physics* **1992**, *64*, 1045.
- [11] S. J. Clark, M. D. Segall, C. J. Pickard, P. J. Hasnip, M. I. Probert, K. Refson, M. C. Payne, *Zeitschrift für Kristallographie-Crystalline Materials* **2005**, *220*, 567-570.
- [12] J. P. Perdew, K. Burke, M. Ernzerhof, *Phys. Rev. Lett* **1996**, *77*, 3865-3868.
- [13] D. Hamann, M. Schlüter, C. Chiang, *Physical Review Letters* **1979**, *43*, 1494.
- [14] H. Monkshort, J. Pack, *Phys. Rev. B* **1976**, *13*, 5188-5192.
- [15] B. G. Pfrommer, M. Côté, S. G. Louie, M. L. Cohen, *Journal of Computational Physics* **1997**, *131*, 233-240.
- [16] S. Baroni, S. De Gironcoli, A. Dal Corso, P. Giannozzi, *Reviews of Modern Physics* **2001**, *73*, 515.
- [17] V. Deyirmenjian, V. Heine, M. Payne, V. Milman, R. Lynden-Bell, M. Finnis, *Physical Review B* **1995**, *52*, 15191.
